# Supplementary material for: Multi-mycotoxin and tropane alkaloid contamination in legume-based foods: a comparative exposure assessment between Italy and Thailand
Source: Research Square preprint supplement (doi:10.21203/rs.3.rs-8761642/v1), 2026-02-20
Supplement: Supplementary file 1 [file f528088bf8f7f3241dedc6f3.docx]

**Supplementary material 1**. Raw legumes (n= 51) used in this study.

| **Legume** | **Italy** | **Thailand** |
| --- | --- | --- |
| Lentils (n=9) | Green lentils | Orange lentils (n =2) |
| Organic red lentils | Brown lentils |
| Yellow lentils |  |
| Black lentils |
| Red lentils (n = 2) |
| Chickpea (n =8) | Organic chickpea | Brown chickpea |
| White chickpea - reale | Chickpea (n=3) |
| Chickpea | Organic Chickpea |
| Red Kidney beans (n=4) | Red Kidney beans | Red Kidney beans (n=3) |
| Red beans (n=4) | Red beans - Azuki Rossi | Red beans (n=2) |
|  | Dried red beans |
| Navy beans (n=4) | Organic Navy beans | Navy beans (n=2) |
| Navy beans |  |
| Borlotti Beans (n=2) | Oganic Borlotti beans |  |
| Borlotti beans |  |
| Peanuts (n =6) | Organic peanuts toasted with shell | Pelled peanuts (n=2) |
| Peanuts toasted with shell | Peanuts (n=2) |
| Mung beans (n=4) | Organic Mung beans | Mung beans (n=2) |
|  | Peeled split mung bean (n=2) |
| Soy (n=4) |  | Peeled split soy bean  Soy bean (n=2)  Split Soy bean |
| Black beans (n=4) | Black beans | Black beans (n=3) |
| Pea (n=2) | Organic Pelled Pea |  |
|  | Green Pea |  |

**Supplementary material 2.** Legumes-based flour (n= 20) used in this study.

| **Legume** | **Italy** | **Thailand** |
| --- | --- | --- |
| Lentils (n=2) | red lentils flour (n=2) |  |
| Chickpea (n=6) | chickpea flour (n =3) | chickpea flour |
| whole chickpea flour (n =2) |  |
| Red bean (n=1) |  | Red bean flour |
| Pea (n=3) | Pea flour | Yellow pea flour |
| Pea protein isolate |  |
| Mung bean (n=3) |  | Mung bean flour  Peeled mung bean flour  Mung bean starch |
|  |
|  |
| Soy (n=3) | Soy grits (n=2) | Soybean flour |
| Black bean (n=2) |  | Black bean flour (n=2) |

**Supplementary material 3.** Legume-based pasta (n= 26) used in this study.

| **Legume** | **Italy** | **Thailand** |
| --- | --- | --- |
| Lentils (n=6) | Red lentils pasta (n=2) | Red lentils pasta |
| Organic red lentils pasta | Organic red lentils pasta (n=2) |
| Chickpea (n=5) | Organic chickpea pasta | Organic chickpea pasta |
| Chickpea pasta (n=2) | Chickpea pasta |
| Green pea (n=3) | Green pea pasta (n=2) |  |
| Organic green pea pasta |  |
| Mung beans (n=6) |  | Organic mung bean pasta (n=2) |
|  | Glass noodles (n=4) |
| Mixed beans (n=6) | chickpea & red lentils & pea | Pea Flour (25%), Chickpea Flour (25%), Borlotti Bean Flour (25%), Lentil Flour (25%). |
| chickpea & red lentils | Organic Mung Bean Flour 28.33%, Organic Brown Rice Flour 25.67%, Organic red lentils 24.33%; Organic Chickpea Flour 21.67% - Fusilli |
| red lentils & pea | Organic Multi-Color Beans Pasta: mung beans, red kidney beans |

**Supplementary material 4**. Legume-based snacks (n= 27) used in this study.

| **Legume** | **Italy** | **Thailand** |
| --- | --- | --- |
| red lentils (n=3) | Organic red lentils balls (51%) |  |
| Red lentils - toasted |  |
| Organic red lentils snack (96%) |  |
| chickpea (n=4) | Chickpea Maremma chips (60%)  Chickpea - toasted  Chickpea salted snack | Chickpea 65% |
|  |
|  |
| Broad bean (n=3) | Broad beans - toasted | Salted peeled broad beans |
|  | Salted **not** peeled broad beans |
| Soybean (n=2) | Edamame - toasted  Organic soybeans - toasted |  |
|  |
| Green Pea (n=4) | Organic Green Pea Snack Salted chips (91%) | Salted green pees  Green pea snack - roasted (76%)  Green Pea snack (70% ) |
| Mung bean (n=1) |  | Salted mung beans |
| Black bean (n=1) |  | Black bean (60%) |
| Red bean (n=2) |  | Red bean (60%) |
|  | Red bean (60%) |
| White Bean (n=1) |  | white beans (50%) |
| Mixed Snacks (n=6) | Organic snack with green pea (76%) + red lentils (20%) | Green mung bean chips (61%) + soy beans (34%) |
| Snack with green lentils (50%) + chick pea flour |  |
| Organic snack chickpea (47%) + lentils (37%) |  |
| Crackers of chickpea flour + bean flour + lentils flour (40%) |  |
| Organic snack chickpea 66% and rice 30% |  |

**Supplementary Material 5.** Retention time (RT), the most abundant m/z ions, and optimal collision energy (CE)

| **Compound name** | **Precursor ion (m/z)** | **Product ions (m/z)** | **RT (min)** | **Fragmentor (V)** | **CE (eV)** | **Polarity** |
| --- | --- | --- | --- | --- | --- | --- |
| **15-AcDON** | 356.1 | 321.1/137.0 | 5.5 | 70/70 | 12/6 | Positive |
| **AFB1** | 313.3 | 285.1/241/1 | 6.5 | 190/190 | 20/40 | Positive |
| **AFB2** | 315.1 | 287.1/259.1 | 6.3 | 154/154 | 26/30 | Positive |
| **AFG1** | 329.1 | 243.1/200.0 | 6.0 | 139/139 | 26/46 | Positive |
| **AFG2** | 331.1 | 245.0/189.1 | 5.8 | 150/150 | 12/30 | Positive |
| **AFM1** | 329.1 | 273.2/259.0 | 5.9 | 180/180 | 33/33 | Positive |
| **Atropine** | 290.1 | 93.0/124.0 |  | 95/95 | 35/25 | Positive |
| **BEA** | 801.5 | 133.9/119.0 | 10.3 | 138/138 | 78/146 | Positive |
| **CPA** | 337.1 | 196.1/140.1 | 8.7 | 90/90 | 20/30 | Positive |
| **DAS** | 384.2 | 105.0/107.1 | 6.4 | 60/90 | 40/25 | Positive |
| **ENA** | 699.5 | 682.5/209.9 | 10.1 | 138/138 | 14/34 | Positive |
| **ENA1** | 686.3 | 669.4/210 | 10.4 | 120/140 | 30/30 | Positive |
| **ENB** | 658.5 | 87.1/55.0 | 10.0 | 138/138 | 82/170 | Positive |
| **ENB1** | 672.5 | 655.2/99.8 | 10.2 | 138/138 | 14/74 | Positive |
| **FB1** | 722.4 | 352.5/334.4 | 7.2 | 180/120 | 40/50 | Positive |
| **FB2** | 706.4 | 336.3/74.1 | 8.3 | 220/170 | 36/45 | Positive |
| **FUS** | 180.0 | 134.1/92.0 | 5.2 | 65/65 | 15/30 | Positive |
| **HT2** | 442.4 | 262.9/197.1 | 7.2 | 40/100 | 45940 | Positive |
| **MPA** | 321.1 | 207.0/159.0 | 7.7 | 110/100 | 25/20 | Positive |
| **NEO** | 400.3 | 305.2/215.2 | 4.7 | 70/70 | 10/20 | Positive |
| **OTA** | 404.1 | 239.0/221.0 | 8.6 | 135/135 | 20/36 | Positive |
| **OTB** | 370.1 | 187.1/159.0 | 7.7 | 100/80 | 40/40 | Positive |
| **PAX** | 436.2 | 182.2/129.9 | 9.7 | 70/70 | 40/60 | Positive |
| **PEN-A** | 634.3 | 558/332 | 9.5 | 135/100 | 20/40 | Positive |
| **Scopolamine** | 304.1 | 138.0/145.0 |  | 95/90 | 29/20 | Positive |
| **STG** | 325.1 | 310.0/281.0 | 8.8 | 130/100 | 25/37 | Positive |
| **T-2** | 484.2 | 215.2/185.1 | 7.8 | 140/140 | 4/14 | Positive |
| **TEN** | 415.2 | 91/58 | 7.1 | 100/100 | 75/50 | Positive |
| **3-AcDON** | 397.1 | 307.2/59.0 | 5.5 | 82/80 | 22/86 | Negative |
| **AOH** | 257.0 | 242.0/215.0 | 7.8 | 100/100 | 30/30 | Negative |
| **AME** | 271.1 | 228.0/256.0 | 9.1 | 100/100 | 25/25 | Negative |
| **CIT** | 281.1 | 249/205.1 | 8.1 | 85/85 | 20/25 | Negative |
| **DON** | 355.1 | 294.8/59.0 | 4.6 | 75/75 | 4/20 | Negative |
| **EMO** | 269.0 | 224.9/182.1 | 9.9 | 125/125 | 30/40 | Negative |
| **MON** | 97.0 | 41.1/41.0 | 2.4 | 60/65 | 15/15 | Negative |
| **NIV** | 371.2 | 205.0/281/.2 | 4.1 | 80/80 | 20/20 | Negative |
| **TeA** | 319.1 | 212.9/227.0 | 9.1 | 161/161 | 38/33 | Negative |
| **ZEN** | 317.1 | 273.2/175.0 | 8.6 | 150/180 | 20/25 | Negative |
| **α-ZAL** | 322.1 | 62.8/40.9 | 8.0 | 100/100 | 50/90 | Negative |
| **α-ZEL** | 319.1 | 144.1/41.1 | 8.2 | 90/100 | 40/90 | Negative |
| **β-ZAL** | 321.1 | 132.0/107.1 | 7.4 | 130/135 | 35/40 | Negative |
| **β-ZEL** | 319.1 | 159.9/130.1 | 7.6 | 100/100 | 30/40 | Negative |

**Supplementary Material 6**. Performance characteristics of the method for the validated analytes at 3 spiking levels, calculated based on the detection range.

| Analyte | **Multi-legumes matrix** | | | | | | | | |
| --- | --- | --- | --- | --- | --- | --- | --- | --- | --- |
| Range of detection (µg/kg) | Linearity (R2) | Recovery (%) | | | ME (%) | LOD (µg/kg) | LOQ (µg/kg) | Intra day (%) (n=6) |
| LL | ML | HL |
| **15-AcDON** | 5 - 125 | 0.998 | 107 | 100 | 100 | -26,72 | 4,79 | 16,0 | 7 |
| **3-AcDON** | 2.5 - 125 | 0.999 | 114 | 95 | 89 | -37,22 | 2,41 | 8,0 | 14 |
| **AFB1** | 0.125 - 12.5 | 0.999 | 101 | 99 | 88 | -10,23 | 0,04 | 0,1 | 4 |
| **AFB2** | 0.125 - 12.5 | 0.999 | 106 | 115 | 100 | -10,46 | 0,06 | 0,2 | 3 |
| **AFG1** | 0.025 - 6.25 | 0.999 | 117 | 108 | 101 | -14,19 | 0,01 | 0,0 | 2 |
| **AFG2** | 0.025 - 12.5 | 0.999 | 101 | 104 | 101 | -15,38 | 0,05 | 0,2 | 4 |
| **AFM1** | 0.125 - 12.5 | 0.999 | 114 | 108 | 103 | 7,01 | 0,08 | 0,3 | 1 |
| **AOH** | 0.25 - 125 | 0.999 | 78 | 86 | 82 | -10,22 | 0,08 | 0,3 | 2 |
| **AME** | 0.1 - 50 | 0.999 | 108 | 105 | 100 | -11,84 | 0,03 | 0,1 | 2 |
| **Atropine** | 0.07 - 12.5 | 0.999 | 114 | 110 | 101 | -47,99 | 0,07 | 0,2 | 3 |
| **α-ZAL** | 5 - 125 | 0.996 | 95 | 75 | 86 | -8,69 | 3,51 | 11,7 | 22 |
| **α-ZEL** | 2.5 - 125 | 0.999 | 117 | 105 | 100 | -14,33 | 0,38 | 1,3 | 1 |
| **BEA** | 0.5 - 50 | 0.999 | 101 | 106 | 101 | -5,93 | 0,02 | 0,1 | 3 |
| **β-ZAL** | 1.25 - 125 | 0.999 | 98 | 101 | 94 | -15,89 | 1,21 | 4,0 | 10 |
| **β-ZEL** | 0.25 - 125 | 0.999 | 104 | 109 | 103 | -19,55 | 0,21 | 0,7 | 7 |
| **CIT** | 0.2 - 100 | 0.999 | 43 | 51 | 59 | 22,67 | 0,01 | 0,0 | 3 |
| **CPA** | 1 - 100 | 0.999 | 95 | 100 | 97 | -14,49 | 0,37 | 1,2 | 6 |
| **DAS** | 5 - 250 | 0.999 | 93 | 108 | 111 | -3,54 | 0,59 | 2,0 | 4 |
| **DON** | 0.5 - 250 | 0.999 | 97 | 95 | 86 | -19,19 | 0,36 | 1,2 | 10 |
| **EMO** | 0.2 - 100 | 0.999 | 93 | 105 | 97 | -62,25 | 0,10 | 0,3 | 7 |
| **ENNA** | 0.1 - 50 | 0.999 | 105 | 111 | 106 | -11,45 | 0,01 | 0,0 | 2 |
| **ENNA1** | 0.1 - 50 | 0.999 | 105 | 111 | 106 | -11,16 | 0,02 | 0,1 | 3 |
| **ENNB** | 0.1 - 50 | 0.999 | 104 | 110 | 106 | -29,49 | 0,03 | 0,1 | 3 |
| **ENNB1** | 0.5 - 50 | 0.999 | 97 | 102 | 98 | -6,72 | 0,00 | 0,0 | 2 |
| **FB1** | 0.7 - 100 | 0.999 | 72 | 78 | 73 | 3,59 | 0,20 | 0,7 | 10 |
| **FB2** | 0.5 - 100 | 0.999 | 79 | 87 | 82 | 5,79 | 0,15 | 0,5 | 7 |
| **FA** | 0.5 - 250 | 0.999 | 73 | 97 | 101 | -16,41 | 0,32 | 1,1 | 4 |
| **HT-2** | 0.5 - 250 | 0.999 | 112 | 115 | 119 | -7,47 | 0,02 | 0,1 | 3 |
| **MON** | 2.5 - 50 | 0.994 | 54 | 81 | 86 | 60,91 | 0,04 | 0,1 | 3 |
| **MPA** | 5 - 250 | 0.999 | 93 | 113 | 113 | -4,15 | 0,29 | 1,0 | 4 |
| **NEO** | 2.5 - 250 | 0.999 | 99 | 114 | 119 | 2,70 | 0,19 | 0,6 | 3 |
| **NIV** | 7 - 125 | 0.990 | 91 | 61 | 62 | -27,27 | 6,16 | 20,5 | 15 |
| **OTA** | 0.1 - 50 | 0.999 | 98 | 109 | 107 | -5,56 | 0,08 | 0,3 | 3 |
| **OTB** | 0.1 - 50 | 0.999 | 102 | 112 | 106 | -10,94 | 0,04 | 0,1 | 2 |
| **PAX** | 2.5 - 250 | 0.999 | 102 | 100 | 102 | -19,75 | 0,24 | 0,8 | 4 |
| **PEN- A** | 1 - 100 | 0.999 | 109 | 116 | 104 | -14,15 | 0,08 | 0,3 | 3 |
| **Scopolamine** | 0.09 - 12.5 | 0.999 | 102 | 103 | 98 | -6,04 | 0,09 | 0,3 | 2 |
| **STG** | 0.2 - 100 | 0.999 | 115 | 112 | 106 | -27,82 | 0,03 | 0,1 | 3 |
| **T2** | 0.1 - 50 | 0.999 | 105 | 103 | 105 | -7,48 | 0,07 | 0,2 | 3 |
| **TEN** | 0.1 - 50 | 0.999 | 111 | 115 | 110 | -5,62 | 0,01 | 0,0 | 2 |
| **TeA** | 1 - 101 | 0.999 | 106 | 98 | 97 | -11,62 | 0,63 | 2,1 | 8 |
| **ZEN** | 1.25 - 125 | 0.999 | 111 | 107 | 103 | -6,71 | 0,18 | 0,6 | 2 |

**Supplementary Material 7a**. Occurrence of multi-toxins raw legumes
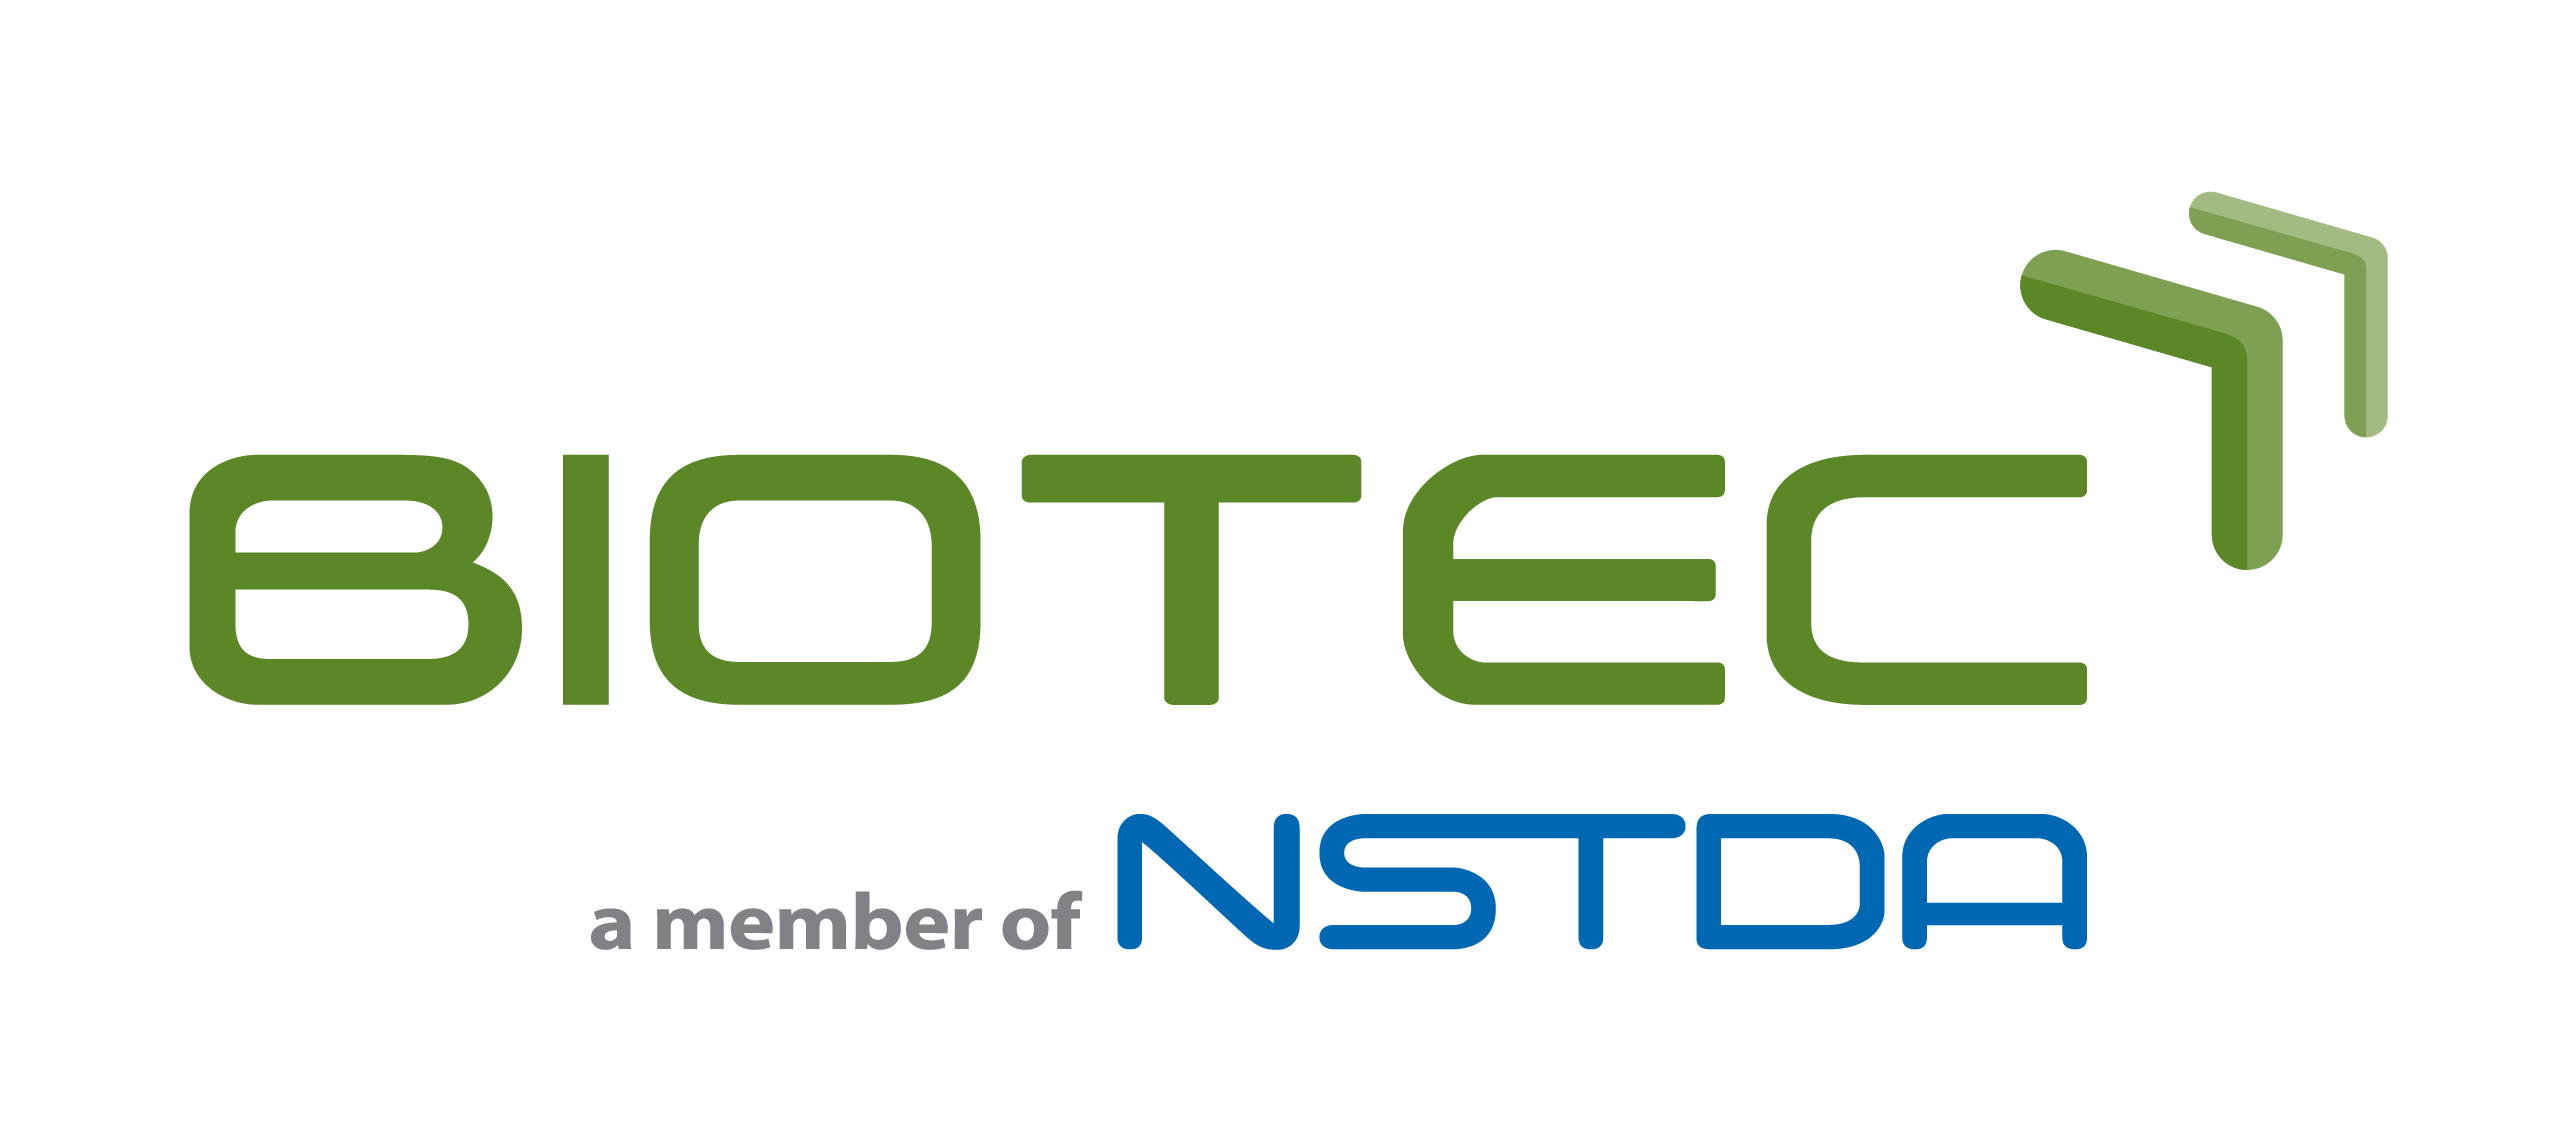
 in Italy

*Og: organic

**Supplementary Material 7b**. Occurrence of multi-toxins raw legumes in Thailand

**
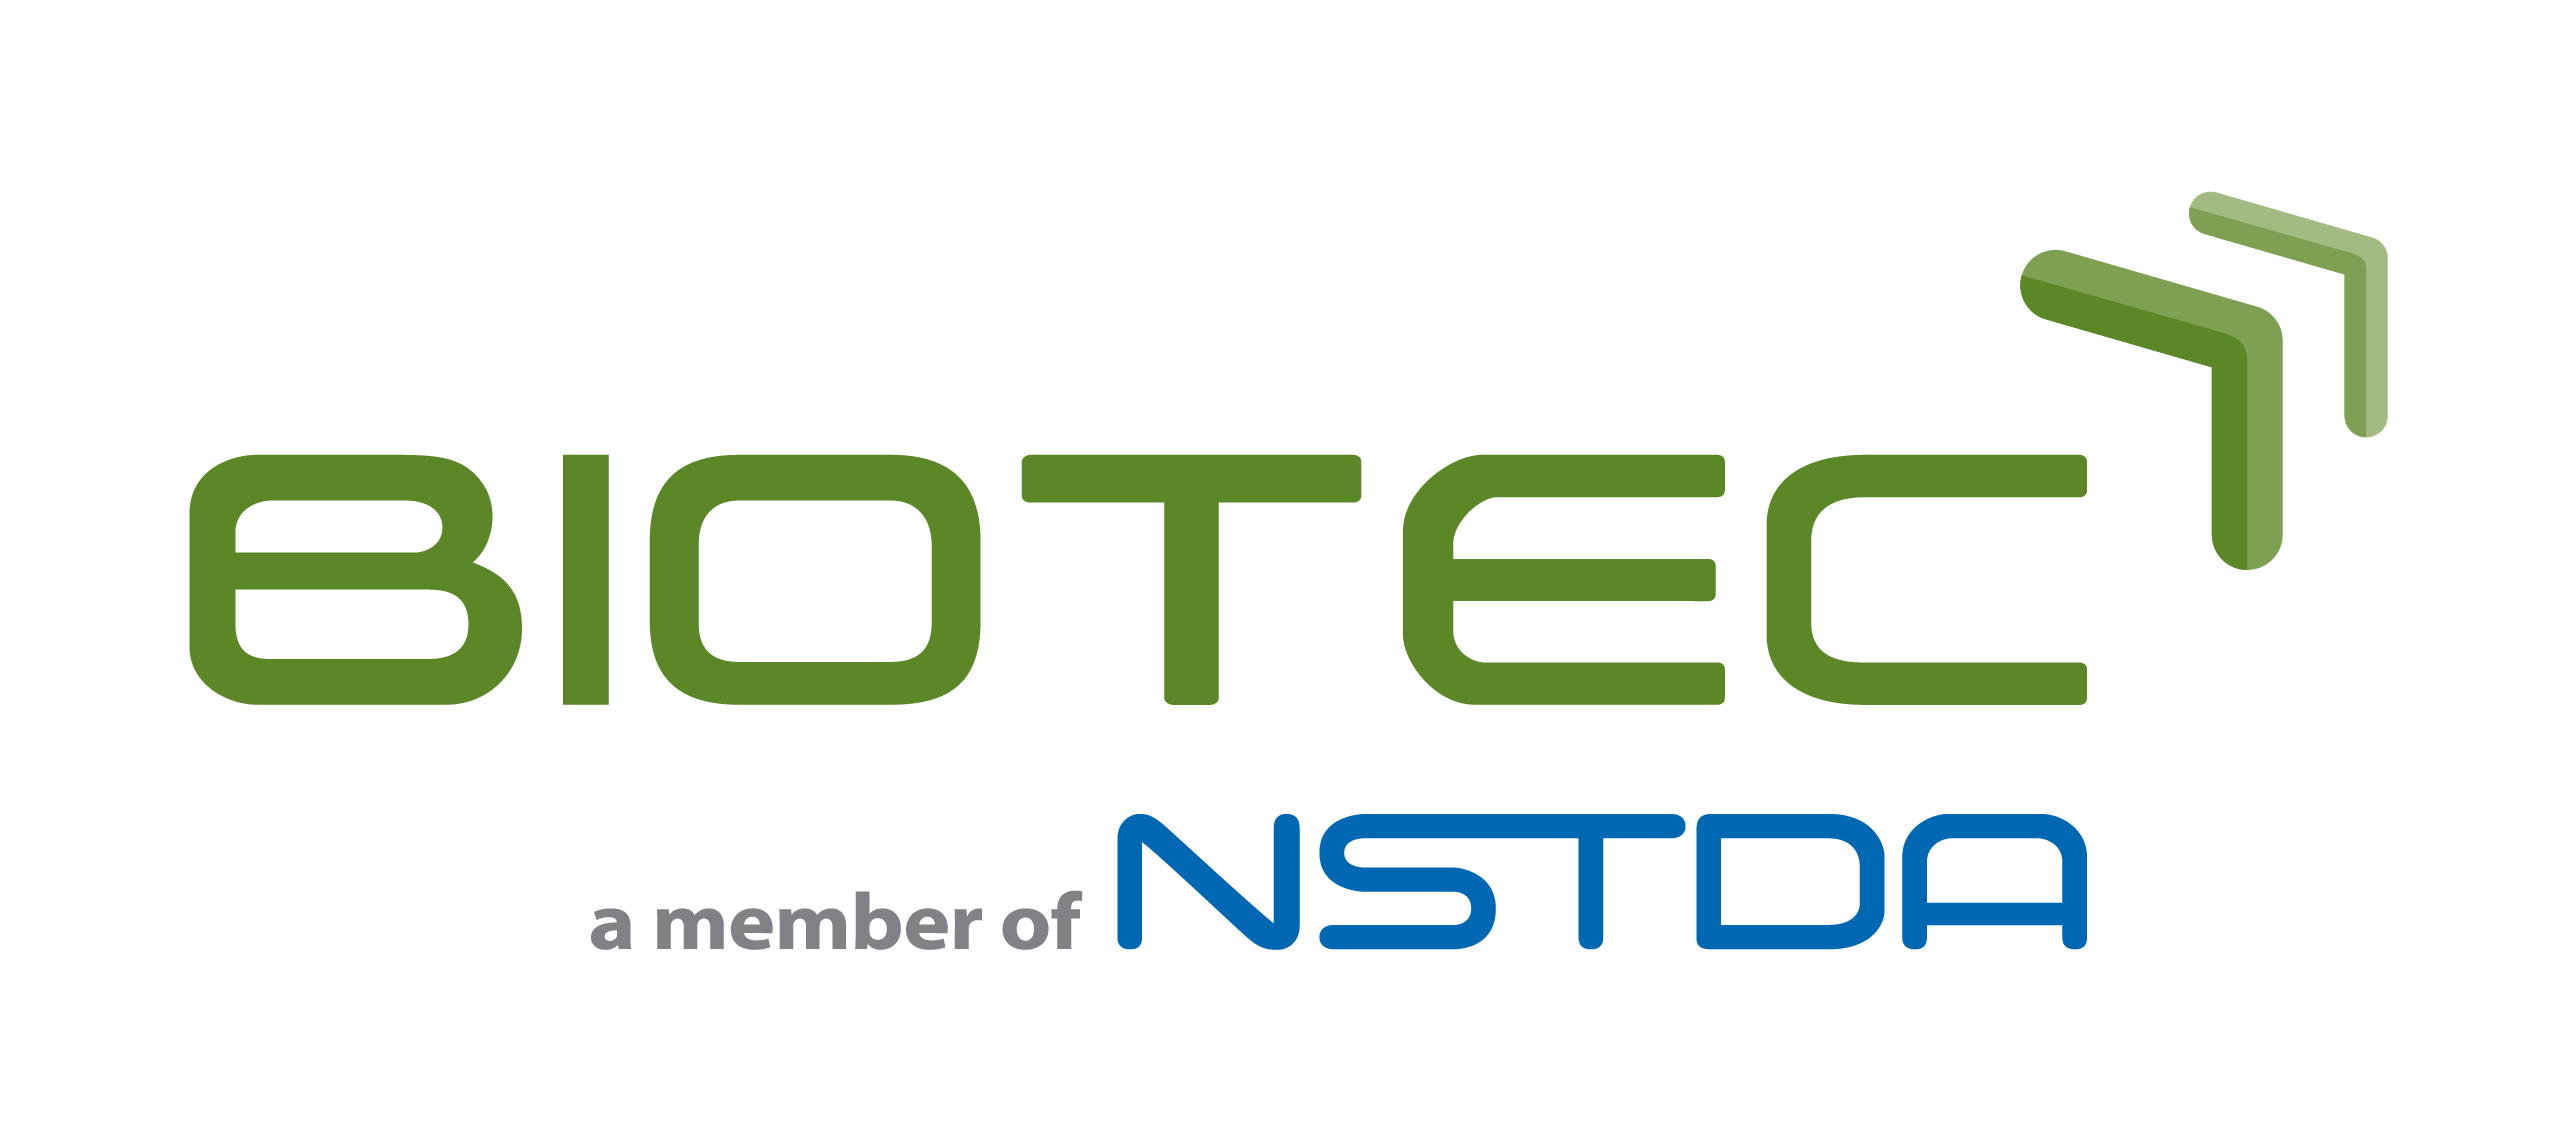
 Supplementary Material 8a**. Occurrence of multi-toxins in legumes’ flour and pasta in Italy

*Og: organic

**Supplementary Material 8b**. Occurrence of multi-toxins legumes’ flour and pasta in Thailand

*Og: organic

**Supplementary Material 9a**. Occurrence of multi-toxins in legume snacks in Italy

*Og: organic

**
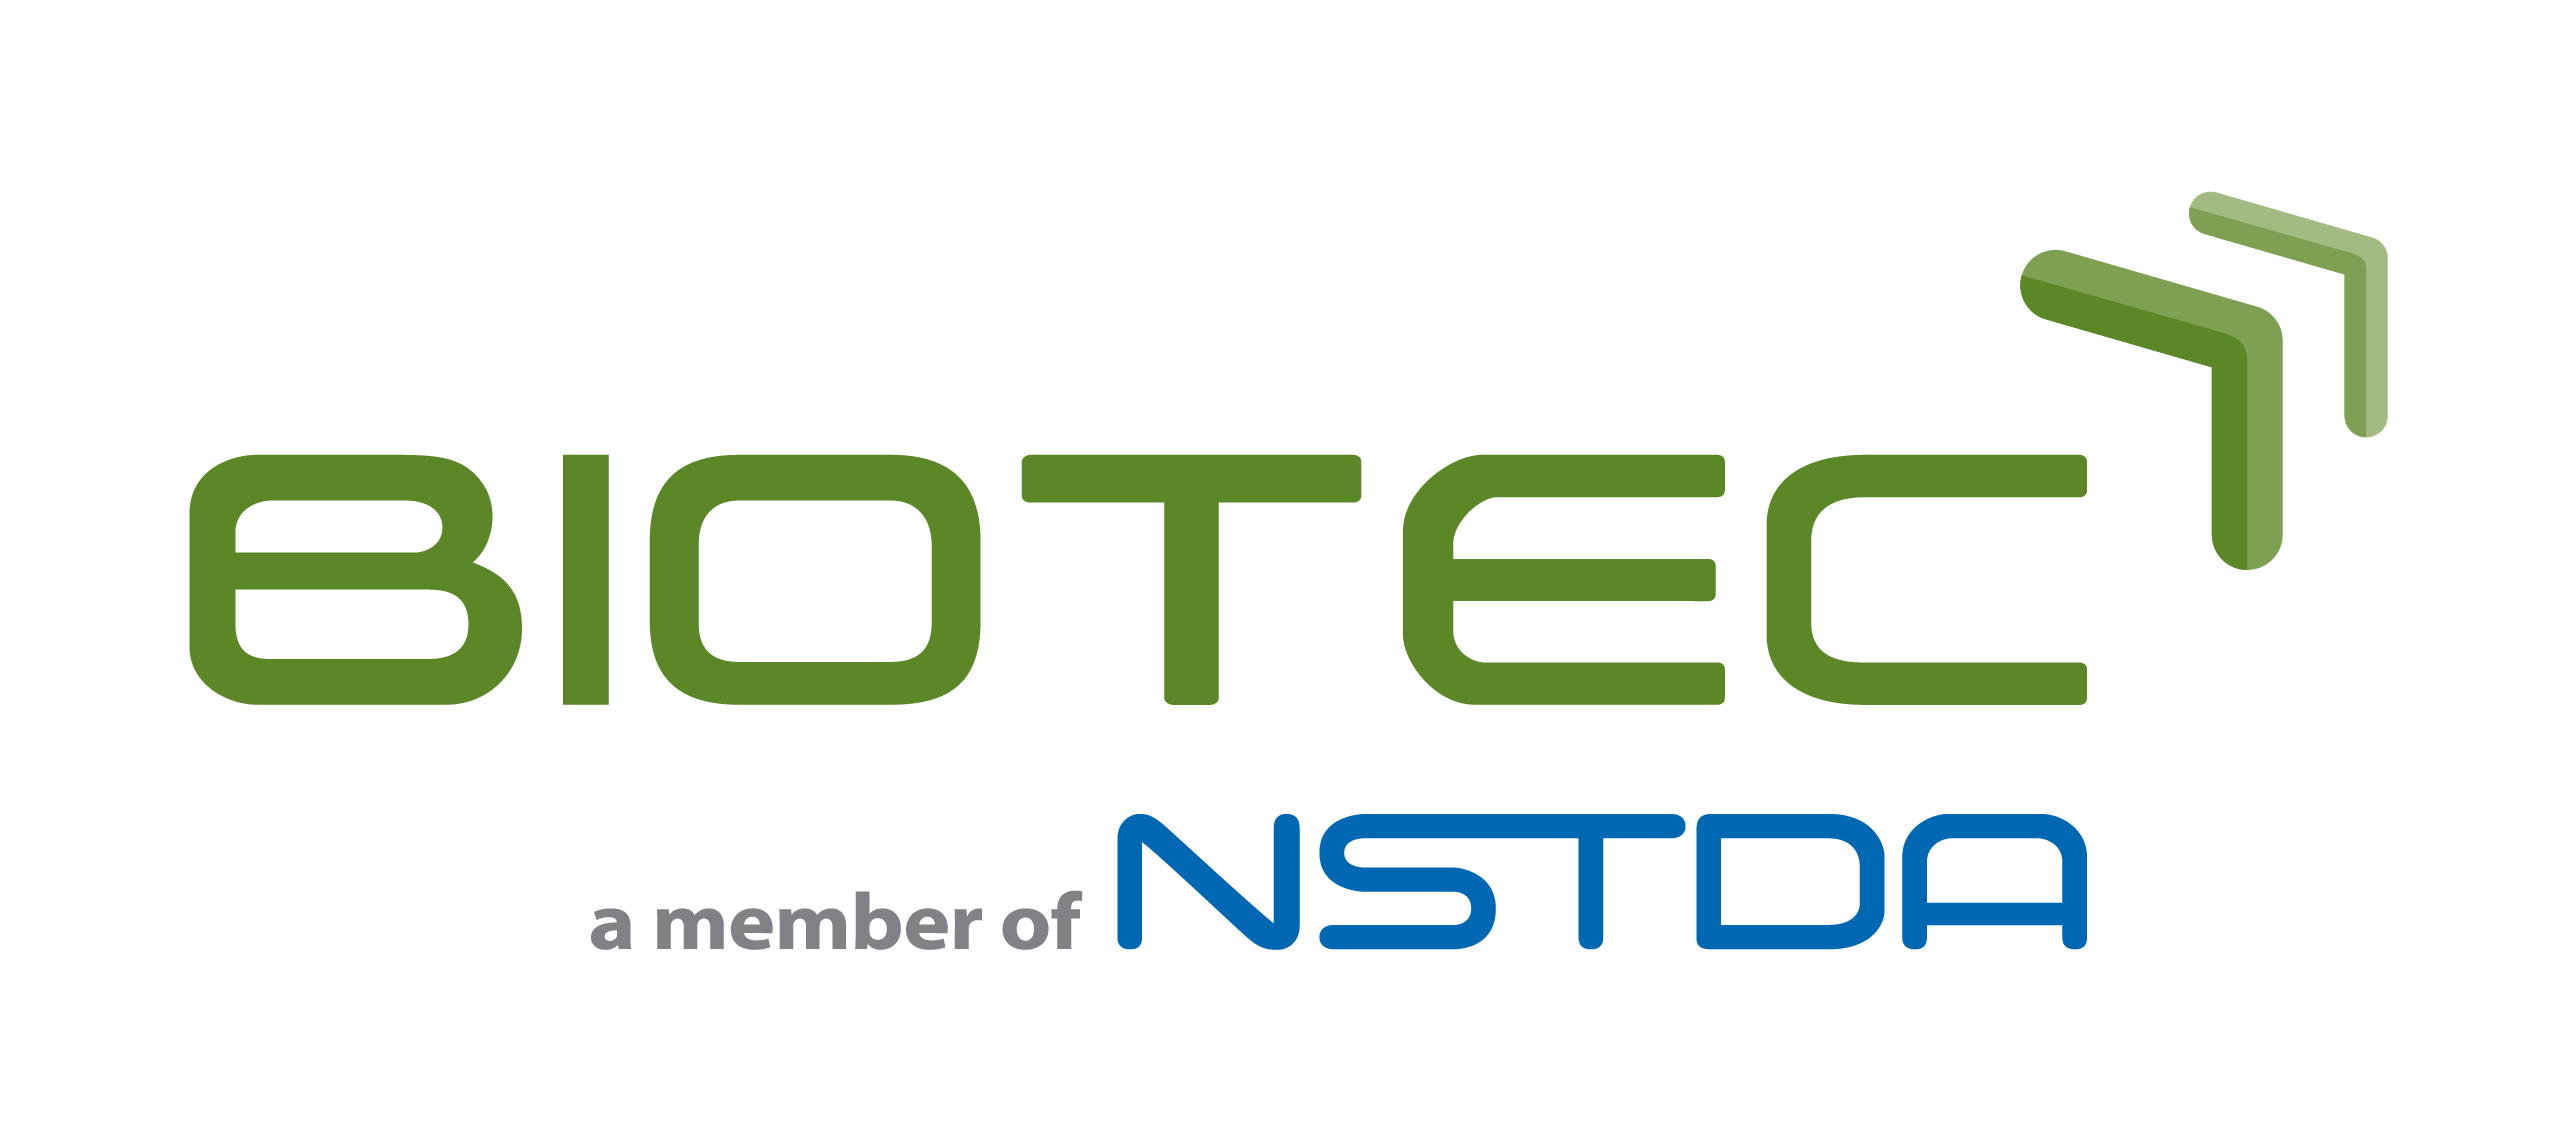
 Supplementary Material 9b**. Occurrence of multi-toxins in legume snacks in Thailand

*Og: organic

**Supplementary Material 10:** Risk characterization of toxins in adult consumers under LB and UB exposure scenarios for raw legumes from Italy (a) and Thailand (b).

**Supplementary Material 11:** Risk characterization of toxins in adult consumers under LB and UB exposure scenarios for legume-based flour & pasta from Italy (a) and Thailand (b).

**Supplementary Material 12:** Risk characterization of toxins in adult consumers under LB and UB exposure scenarios for legume-based snacks from Italy (a) and Thailand (b).
